## 1 **The impact of Mendelian sleep and circadian genetic variants in a population** 2 **setting**

3  
4 Michael N. Weedon<sup>1</sup>, PhD; Samuel E. Jones<sup>1,2</sup>, PhD; Jacqueline. M. Lane<sup>3,4,5</sup>, PhD;  
5 Jiwon Lee<sup>6</sup>, PhD; Hanna M. Ollila<sup>2,7,8,9</sup>, PhD; Amy Dawes<sup>1</sup>, BSc; Jess Tyrrell<sup>1</sup>, PhD;  
6 Robin N. Beaumont<sup>1</sup>, PhD; Timo Partonen<sup>10</sup>, PhD; Ilona Merikanto<sup>10,11</sup>, PhD;  
7 Stephen S. Rich<sup>12</sup>, PhD; Jerome I. Rotter<sup>13,14</sup>, MD; Timothy M. Frayling<sup>1</sup>, PhD; Martin  
8 K Rutter<sup>15,16</sup>, MD; Susan Redline<sup>6</sup>, PhD; Tamar Sofer<sup>6</sup>, PhD; Richa Saxena<sup>3,4,5</sup>, PhD;  
9 Andrew R. Wood<sup>1</sup>, PhD.

- 10
- 11 1. Genetics of Complex Traits, College of Medicine and Health, University of
- 12 Exeter, Exeter, Devon, UK.
- 13 2. Institute for Molecular Medicine Finland (FIMM), HiLIFE, University of
- 14 Helsinki, Helsinki, Finland.
- 15 3. Center for Genomic Medicine, Massachusetts General Hospital and Harvard
- 16 Medical School, Boston, MA, USA.
- 17 4. Broad Institute, Cambridge, MA, USA.
- 18 5. Department of Anesthesia, Critical Care and Pain Medicine, Massachusetts
- 19 General Hospital, Boston, MA, USA.
- 20 6. Division of Sleep and Circadian Disorders, Brigham and Women's Hospital,
- 21 Harvard Medical School, Boston, MA, USA.
- 22 7. Center for Genomic Medicine, Massachusetts General Hospital, Boston, MA,
- 23 USA.
- 24 8. Program in Medical and Population Genetics, Broad Institute, Cambridge, MA,
- 25 USA.
- 26 9. Department of Psychiatry and Behavioral Sciences, School of Medicine,
- 27 Stanford University, Stanford, CA, USA.
- 28 10. Department of Public Health Solutions, Finnish Institute for Health and
- 29 Welfare, Helsinki, Finland.
- 30 11. SleepWell Research Program Unit, Faculty of Medicine, University of Helsinki,
- 31 Helsinki, Finland.
- 32 12. Center for Public Health Genomics, Department of Public Health Sciences,
- 33 University of Virginia, Charlottesville, VA, USA.
- 34 13. Institute for Genomics and Population Sciences, The Lundquist Institute for
- 35 Biomedical Innovation, Torrance, CA, USA.
- 36 14. Department of Pediatrics, Harbor-UCLA Medical Center, Torrance, CA, USA.
- 37 15. Division of Diabetes, Endocrinology and Gastroenterology, Faculty of
- 38 Medicine, Biology and Health, University of Manchester, Manchester, M13
- 39 9PL, UK.
- 40 16. Diabetes, Endocrinology and Metabolism Centre, Manchester University NHS
- 41 Foundation Trust, Manchester Academic Health Science Centre, Peter Mount
- 42 Building, 136 Hathersage Road, Manchester, M13 0HY, UK.
- 43
- 44

45 Corresponding authors:

46 Michael N Weedon  
47 Genetics of Complex Traits  
48 College of Medicine and Health  
49

50 Medical Research - Level 3 RILD Building  
51 Royal Devon & Exeter Hospital  
52 Barrack Road  
53 Exeter EX2 5DW  
54 Email: M.N.Weedon@exeter.ac.uk  
55 Tel: +44 1392 408176  
56  
57 Andrew R Wood  
58 Genetics of Complex Traits  
59 College of Medicine and Health  
60 Medical Research - Level 3 RILD Building  
61 Royal Devon & Exeter Hospital  
62 Barrack Road  
63 Exeter EX2 5DW  
64 Email: A.R.Wood@exeter.ac.uk  
65 Tel: +44 1392 408241  
66  
67 Manuscript word count: 4,136  
68

69 **ABSTRACT**

70

71 Rare variants in ten genes have been reported to cause Mendelian sleep conditions  
72 characterised by extreme sleep duration or timing. These include familial natural  
73 short sleep (*ADRB1*, *DEC2/BHLHE41*, *GRM1* and *NPSR1*), advanced sleep phase  
74 (*PER2*, *PER3*, *CRY2*, *CSNK1D* and *TIMELESS*) and delayed sleep phase (*CRY1*).

75 The association of variants of these genes with extreme sleep conditions were  
76 usually based on clinically ascertained families, and their effects when identified in  
77 the population are unknown. We aimed to determine the effects of these variants on  
78 sleep traits in large population-based cohorts.

79

80 We performed genetic association analysis of variants previously reported to be  
81 causal for Mendelian sleep and circadian conditions. Analyses were performed using  
82 191,929 individuals with data on sleep and whole-exome or genome-sequence data  
83 from 4 population-based studies: UK Biobank, FINRISK, Health-2000-2001, and the  
84 Multi-Ethnic Study of Atherosclerosis (MESA). We identified sleep disorders from  
85 self-report, hospital and primary care data. We estimated sleep duration and timing  
86 measures from self-report and accelerometry data.

87

88 We identified carriers for 10 out of 12 previously reported pathogenic variants for 8 of  
89 the 10 genes. They ranged in frequency from 1 individual with the variant in  
90 *CSNK1D* to 1,574 individuals with a reported variant in the *PER3* gene in the UK  
91 Biobank. We found no association of any of these variants with extreme sleep or  
92 circadian phenotypes. Using sleep timing as a proxy measure for sleep phase, only  
93 *PER3* and *CRY1* variants demonstrated association with earlier and later sleep  
94 timing, respectively; however, the magnitude of effect was smaller than previously  
95 reported (sleep midpoint ~7 mins earlier and ~5 mins later, respectively). We also  
96 performed burden tests of protein truncating (PTVs) or rare missense variants for the  
97 10 genes. Only PTVs in *PER2* and *PER3* were associated with a relevant trait (for  
98 example, 64 individuals with a PTV in *PER2* had an odds ratio of 4.4 for being  
99 “definitely a morning person”,  $P=4 \times 10^{-8}$ ; and had a 57-minute earlier midpoint sleep,  
100  $P=5 \times 10^{-7}$ ).

101

102 Our results indicate that previously reported variants for Mendelian sleep and  
103 circadian conditions are often not highly penetrant when ascertained incidentally  
104 from the general population.

105

## 106 INTRODUCTION

107

108 Rare variants in ten genes have been reported to cause Mendelian sleep conditions  
109 that are characterised by extreme sleep duration or timing. For example, variants in  
110 the *ADRB1*, *NPSR1* and *GRM1* genes have been recently reported to cause familial  
111 natural short sleep among carriers, defined as 4 to 6 hours sleep with no adverse  
112 effects on mental health or well-being<sup>1-3</sup>. Short sleep duration has also been reported  
113 to be caused by variants in the *DEC2/BHLHE41* gene, a well-known Mendelian  
114 sleep gene<sup>4</sup>. Familial advanced sleep phase (FASP) where sleep timing is shifted 3  
115 or 4 hours earlier has been reported for variants in *PER2*<sup>5</sup>, *PER3*<sup>6</sup>, *CRY2*<sup>7</sup>,  
116 *CSNK1D*<sup>8</sup> and *TIMELESS*<sup>9</sup>. The opposite condition, familial delayed sleep phase  
117 disorder has been reported to be caused by a gain-of-function *CRY1* variant,  
118 c.1657+3A>C, with affected individuals sleeping approximately 1 hour later than  
119 unaffected individuals<sup>10</sup>.

120

121 The effect of variants in these genes on sleep duration and sleep timing when  
122 identified incidentally in the general population is unknown. Discovery efforts for  
123 these variants generally used either a single pedigree or a small number of families  
124 selected on a specific clinical phenotype. For example, for *ADRB1*, six individuals in  
125 a single family were affected with familial natural short sleep. This “phenotype first”  
126 method of discovery means we do not know the effect of these variants when  
127 identified in an individual from the general population (i.e. from a “genotype first”  
128 approach). It is important to re-evaluate effect estimates to understand the  
129 underlying biology which may inform clinical risk stratification, and because of the  
130 recent dramatic increase in direct-to-consumer (DTC) and health service genome-  
131 wide genetic testing. To assess the effect of these variants when identified  
132 incidentally, large, unselected population cohorts are needed.

133

134 Estimating the effects of these variants in the general population has not previously  
135 been possible due to limitations in the availability of genetic data coupled with sleep  
136 parameters. The UK Biobank, a population-based study of 500,000 individuals from  
137 the UK, provides an opportunity to address questions of pathogenicity and  
138 penetrance of rare genetic conditions<sup>11</sup>. We have previously shown, for a range of  
139 traits and diseases, that disease penetrance is generally lower in UK Biobank  
140 compared to that reported from clinical cohorts<sup>12,13</sup>. For example, using activity  
141 monitor derived and self-report estimates of sleep timing from the UK Biobank, we  
142 have demonstrated that the effect of the *PER3* P415A/H417R familial advanced  
143 sleep phase variant on sleep timing is substantially lower than the published  
144 estimate (0.13hrs vs. 4.2hrs)<sup>14</sup>. However, our previous studies were based on  
145 genotyping array data of relatively common single nucleotide polymorphisms  
146 (SNPs). Genotyping arrays are known to capture a relatively small number of rare  
147 coding pathogenic disease variants, typically with poor accuracy for genotyping and  
148 imputation<sup>13,15,16</sup>.

149

150 In this study, we use exome sequencing data in up to 184,065 individuals of  
151 European ancestry from the UK Biobank (October 2020 release) with sleep data,  
152 with additional data from up to 2,015 individuals from the Multi-Ethnic Study of  
153 Atherosclerosis (MESA), and 5,929 individuals from the FinnGen study to  
154 comprehensively assess the penetrance of Mendelian sleep and circadian genes in  
155 a population-based setting. We show that previously reported variants for Mendelian

156 sleep and circadian conditions are often not highly penetrant when identified  
157 incidentally from the general population.

158

159

## 160 **METHODS**

161

### 162 UK Biobank Study Participants

163 The primary study population was drawn from the UK Biobank study – a longitudinal  
164 population-based study of individuals residing in the UK. We restricted our analysis  
165 to a subset of 184,532 Europeans with whole-exome sequence data, including  
166 170,518 unrelated Europeans (<3<sup>rd</sup> degree) defined through kinship coefficients  
167 made available from the UK Biobank. Details on derivation of genetic ancestry has  
168 previously been reported in Jones *et al.*<sup>14</sup>.

169

### 170 Exome sequence data in UK Biobank

171 We used the second release of exome-sequence data from the UK Biobank  
172 (October 2020). Specifically, we use genotypes called and provided in binary PLINK  
173 format (data field: 23155). Genotypes for previously reported Mendelian causes of  
174 sleep and circadian conditions were extracted for subsequent data analysis. Details  
175 of central processing of whole-exome data on 200K UK Biobank participants can be  
176 found online as part of UK Biobank's data showcase:

177 <https://biobank.ctsu.ox.ac.uk/crystal/label.cgi?id=170>. All variants passed central  
178 quality control<sup>17</sup>. Sequence data for variants analysed in this paper were manually  
179 inspected through IGV<sup>18</sup> plots.

180

### 181 Sleep phenotypes and variant selection

182 We focussed our analysis on phenotypes previously reported to have Mendelian  
183 causes, specifically familial natural short sleep ( $\leq 6$  hours)<sup>1,3,4</sup>, familial advanced  
184 sleep phase characterised by earlier sleep onset and earlier waking<sup>5-9</sup>, and delayed  
185 sleep phase disorder associated with later sleep onset and later waking<sup>10</sup>.

186

187 Sleep disorders and medication. We used data from the UK Biobank variable  
188 131061 (<https://biobank.ndph.ox.ac.uk/showcase/field.cgi?id=131061>) which  
189 classifies individuals as having a sleep disorder based on self-report, hospital and  
190 primary care data. As this variable does not separate out sub classifications of sleep  
191 disorders we used ICD-10 codes G472 and F512 from in-patient data to specifically  
192 assess disorders of the sleep wake cycle. Medication use at baseline in the UK  
193 Biobank was identified from variable 20003

194 (<https://biobank.ctsu.ox.ac.uk/crystal/field.cgi?id=20003>). Classification of sleep  
195 medication used in this paper has previously been described<sup>19</sup>. Since 'sleep' is a  
196 behavior, phenotyping is complicated. There are extreme sleep patterns like ASP  
197 and NSS which are often not considered 'disorders' by individuals if the trait does not  
198 interfere with an individual's work and social demands<sup>20</sup>.

199

200 Sleep Duration. We used self-reported sleep duration from UK Biobank  
201 questionnaire data (data field: 1160). We excluded individuals who reported >12  
202 hours sleep duration, did not know or preferred not to answer. This data was also  
203 dichotomized for multiple analyses to define "short sleepers" as individuals self-  
204 reporting sleep duration  $\leq 6$  hours,  $\leq 5$  hours,  $\leq 4$  hours, and  $\geq 4$  hours  $\leq 6$ . A maximum  
205 of 166,360 individuals had genotype and self-report sleep duration available across

206 the variants previously reported to be Mendelian causes of familial natural short  
207 sleep and prioritised for analysis. In addition, we used accelerometer estimates of  
208 nocturnal sleep derived in a previous study<sup>21</sup>. A maximum subset of 34,241  
209 individuals remained for analysis of accelerometer-based sleep duration estimates  
210 after removing individuals (n=4,323) with problematic accelerometer data processing  
211 or who were outliers for the number of nocturnal sleep episodes used to derive  
212 nocturnal sleep estimates<sup>21</sup>. There was no association for individual variants or  
213 overall with the individuals removed from the accelerometer analyses. We also  
214 applied additional quality control among non-carriers of previously reported variants  
215 described in this study by removing individuals with >12 hours estimated sleep  
216 duration.

217  
218 *Sleep timing.* We used self-reported diurnal preference available in the UK Biobank  
219 (data field: 1180) as a proxy for sleep timing, whereby we assumed morning people  
220 to sleep earlier and evening people to sleep later. We created four binary variables  
221 to represent diurnal preference where individuals were coded '1' based on being: 1)  
222 definitely a morning person; 2) more or definitely a morning person; 3) definitely an  
223 evening person, and 4) more or definitely an evening person. For each variable,  
224 individuals who did not report having the respective circadian preference(s)  
225 (including "Do not know" but excluding "Prefer not to answer") were coded '0'. A  
226 maximum of 168,409 individuals had genotype data and self-report chronotype data  
227 across the variants associated with advanced and delayed sleep phase. In addition,  
228 we used accelerometer estimates from up to 7 nights of the least-active 5 hours (L5)  
229 over a 24-hour period, with values representing hours from the previous midnight  
230 (e.g. 7 p.m. = 19 and 2 a.m. = 26)<sup>21</sup>. Sleep midpoint was estimated as the mid-  
231 point of the sleep period time window used to define sleep duration<sup>21</sup>. In total, a  
232 maximum subset of 34,650 individuals remained for statistical analysis of  
233 accelerometer-based sleep timing estimates. We applied additional quality control  
234 among non-carriers of previously reported variants described by removing  
235 individuals outside 4 standard deviations of the respective trait (midpoint sleep or L5  
236 timing) analysed.

237

### 238 *Replication of Findings*

239 To replicate our UK Biobank observations of previously reported variant-phenotype  
240 associations, we used self-reported measures of sleep duration and circadian  
241 preference (chronotype) in up to 5,929 individuals from two population-based studies  
242 from Finland: FINRISK<sup>22</sup> and Health-2000-2011  
243 (<https://www.julkari.fi/handle/10024/130780>), available through the FinnGen Project  
244 (<https://www.finnngen.fi/en>). In addition, we used accelerometer-based estimates of  
245 sleep timing (sleep midpoint) in up to 1,935 individuals from the Multi-Ethnic Study of  
246 Atherosclerosis (MESA) Sleep Study<sup>23</sup> where sequence-based genotypes of  
247 previously reported variants associated with sleep timing from its Exam 5 were  
248 available (see Supplementary Information for study descriptors).

249

### 250 *Statistical Analysis*

251 *Defining genotype groups for comparison of sleep parameter estimates.* For each  
252 variant, summaries of sleep parameter estimates were analysed with by genotype.  
253 The set of individuals classified as homozygous reference for all variants was the  
254 same after removing individuals from this genotype group who were carriers for other  
255 variants.

256

257 *Analysis of self-report phenotypes.* t-tests tests were performed to compare means  
258 and standard deviations of the continuous self-report sleep duration variables across  
259 genotype groups and carrier status, respectively. For dichotomized variables,  
260 Fisher's exact tests were performed to compare proportions of individuals labelled as  
261 short sleepers or had a defined circadian preference (above) across genotype  
262 groups. Alternate homozygous counts were combined with heterozygous counts  
263 when performing Fisher's exact test where applicable. In addition, logistic regression  
264 was performed using UK Biobank data to obtain odds ratios, adjusting for age at  
265 baseline (field 21003), sex (field 31), assessment centre (field 54), month when  
266 attending the assessment centre (field 55), and 40 genetic principal components  
267 (field 22009) available from the UK Biobank.

268

269 *Accelerometer-derived phenotypes.* t-tests were performed to compare means and  
270 standard deviations of the accelerometer-based estimates of sleep duration, sleep-  
271 midpoint and L5 timing.

272

273 *Burden testing of rare loss-of-function and missense variants in UK Biobank.* Genetic  
274 variants identified in the ten previously reported genes were annotated using the  
275 Ensembl Variant Effect Predictor (VEP)<sup>24</sup> and LOFTEE<sup>25</sup>. Variants with MAF<0.0001  
276 and annotated as missense or loss-of-function with high confidence were analysed  
277 through burden testing as implemented in Regenie<sup>26</sup> that accounts for relatedness  
278 among individuals analysed. We analysed up to 184,065 individuals of inferred  
279 European genetic ancestry with available sleep and covariate data.

280

281

## 282 **RESULTS**

283

284 *Most reported Mendelian sleep variants are present in UK Biobank and are not*  
285 *associated with sleep disorders*

286 We assessed the frequencies of 12 variants in 10 genes that have been reported to  
287 cause familial natural short sleep, familial advanced sleep phase, or delayed sleep  
288 phase conditions (**Table 1**). All were present in the UK Biobank in unrelated  
289 individuals of European ancestry except for the S662G variant in *PER2* (not present  
290 in gnomAD (version 2.1)) and the Y206H variant in *NPSR1*. In addition, we identified  
291 carriers for previously reported variants in *GRM1*, *BHLHE41/DEC2*, *CRY1*, and  
292 *PER3* in the MESA and Finnish studies (**Table 2**). None of the variants were  
293 associated with any self-report or clinically diagnosed sleep disorder in UK Biobank,  
294 including the G472 or F512 ICD-10 code for disorders of the sleep wake cycle or  
295 with sleep medication use (**Supplementary Table 1**). We noted in the FinnGen  
296 study there was a nominal association with ICD10 code G472 (circadian rhythm  
297 sleep disorders) for the *CRY1* c.1657+3A>C variant (0.05% in controls vs. 0.29% in  
298 cases,  $P=0.026$ ), but this variant is 10-fold rarer in the Finnish population than in  
299 non-Finnish Europeans and is imputed with a quality score of only 0.76.

300

301 *ADRB1, GRM1, or DEC2/BHLHE41 pathogenic variants are not associated with self-*  
302 *reported short sleep duration in population-based cohorts*

303 We identified 149 unrelated individuals from the UK Biobank with self-reported  
304 measures of sleep duration and carrying a previously reported pathogenic variant for  
305 natural short sleep in *ADRB1* (A817V,  $n=69$ ), *DEC2/BHLHE41* (P384R,  $n=10$ ), or

306 *GRM1* (S458A,  $n=67$ ; A889T,  $n=3$ ). We found no evidence that these individuals  
307 have short sleep durations in the UK Biobank (**Table 3** and **Supplementary Tables**  
308 **2** and **3**). For example, the 69 carriers of the *ADRB1* variant had a self-reported  
309 average sleep duration of 7.1 hours (95% CI: 6.9, 7.3) compared to 7.2 hours (95%  
310 CI: 7.19, 7.21) among non-variant carriers (t-test  $P=0.62$ ). The proportion of *ADRB1*  
311 variant carriers self-reporting  $\leq 6$  hours of sleep, 23.2%, was no different to the  
312 proportion of people not carrying the variant, 23.7% (Fisher's exact  $P=1.00$ ). Using a  
313 fully adjusted logistic regression model gave similar results with an odds ratio of 0.98  
314 (95% CI: 0.56–1.72;  $P=0.96$ ) for sleeping less than 6 hours. We observed zero  
315 carriers of the *ADRB1* variant self-reporting a more extreme phenotype of  $\leq 4$  hours  
316 of sleep. Similar observations were made for previously reported monogenic sleep  
317 disruption variants in *DEC2/BHLHE41* and *GRM1*. The 10 carriers of the P384R  
318 variant in the *DEC2/BHLHE41* gene had an average self-reported sleep duration of  
319 7.3 hours compared to 7.2 hours among non-carriers ( $P=0.69$ ), with 10% of carriers  
320 reporting  $\leq 6$  hours sleep duration compared to 23.7% among non-carriers of  
321 reported variants ( $P=0.47$ ). Carriers for variants in the *GRM1* gene did not  
322 significantly differ in sleep duration from non-carriers (S458A: 7.1 hours (carriers) vs  
323 7.2 hours (non-carriers),  $P=0.81$ ; A889T: 8 hours (carriers) vs 7.2 hours (non-  
324 carriers),  $P=0.18$ ), or the number of individuals reporting sleep duration of  $\leq 6$  hours  
325 (S458A: 28.4% (carriers) vs 23.7% (non-carriers),  $P=0.39$ ; A889T: 0% (carriers) vs  
326 23.8% (non-carriers),  $P=1.00$ ). The null effect of the S458A variant in *GRM1* was also  
327 observed in FinnGen where 2 S458A carriers were identified and had no statistically  
328 significant difference compared to non-carriers in average sleep duration (t-test  
329  $P=0.92$ ) or proportion self-reporting  $\leq 6$  hours sleep (Fisher's exact  $P=1.00$ ) (**Table**  
330 **3**).

331  
332 *ADRB1*, *GRM1*, or *DEC2/BHLHE41* pathogenic variants are not associated with  
333 accelerometer derived measures of sleep in population based cohorts  
334 We confirmed the lack of association between previously identified pathogenic  
335 variants and sleep duration using accelerometer estimates of sleep in a subset of  
336 34,226 individuals from the UK Biobank. Fifteen *ADRB1* variant carriers with  
337 accelerometer-derived sleep estimates had an average sleep duration of 7.6 hours  
338 (95% CI: 7.4, 7.8) compared to 7.3 hours (95% CI: 7.29, 7.31) among non-variant  
339 carriers (t-test  $P=0.20$ ) (**Table 4**). All 15 *ADRB1* variant carriers had an  
340 accelerometer-based sleep duration average of more than 6 hours (min=6 hours, 53  
341 minutes). Similar observations were made when stratifying accelerometer data  
342 analyses to weekend nights and weekday nights (**Supplementary Table 4**).

343  
344 *PER3*, but not *CRY2* or *TIMELESS*, variants are associated with advanced sleep  
345 phase in the population-based cohorts, but with reduced effect size  
346 Variants in five genes have previously been associated with familial advanced sleep  
347 phase syndrome – characterised by approximately  $\geq 3$  hour shifts towards earlier  
348 sleep and wake times. We previously tested the *PER3* P415A/H417R variant in the  
349 UK Biobank and found it was associated with self-report diurnal preference and  
350 activity monitor derived sleep timing, although the size of the effect on sleep timing  
351 (L5 time) was smaller than the initially published estimate of 4.2 hours (7.8 minutes,  
352 95% CI: 4.2–13.2 minutes,  $P=4.3 \times 10^{-4}$ ). We confirmed this association using exome  
353 sequence data and accelerometer data. The difference on average sleep-midpoint  
354 timing between carriers and non-carriers based on exome-sequence data was 6.8  
355 minutes (95% CI: 1.4–12.3 minutes,  $P=0.01$ ) with a similar effect size for L5 timing



356 **(Table 5)**. Variant carriers had an odds ratio of 1.36 (95% CI: 1.22 – 1.52,  $P=2\times 10^{-8}$ )  
357 for “definitely” being a morning person. We found no evidence that carriers of  
358 previously reported pathogenic variants in the other two genes, *CRY2* and  
359 *TIMELESS*, had altered chronotype, L5 timing or sleep-midpoint indicative of earlier  
360 sleep timing (**Supplementary Tables 5-7**).

361

362 *CRY1* c.1657+3A>C is associated with diurnal preference and a delayed sleep  
363 phase in a population-based cohort, but with reduced effect size  
364 *CRY1* c.1657+3A>C has previously been associated with delayed sleep phase  
365 disorder, characterised by an approximately 1-hour shift towards later sleep and  
366 wake times. In the UK Biobank, 10.1% and 11.1% of *CRY1* heterozygous and  
367 homozygous variant carriers, respectively, reported being “definitely an evening  
368 person”, compared to 7.9 % of non-variant carriers (Fisher’s exact  $P=0.003$ ) (**Table**  
369 **6**). No carriers of the *CRY1* variant reported being “definitely an evening person” in  
370 the Finnish studies. The observed difference in the UK Biobank in sleep-midpoint  
371 estimated from accelerometry for individuals with a *CRY1* variant was 5.4 minutes  
372 later (95% CI:-0.2,11.0,  $P=0.06$ ), with a similar difference observed for L5 timing.  
373 Similar point estimates were observed in our sensitivity analyses that included  
374 restricting accelerometer data analyses to either weekend nights or weekday nights  
375 (**Supplementary Tables 8-10** and **Supplementary Figs 1-3**).

376

377 *Heterozygous protein truncating variants in reported Mendelian sleep genes PER2*  
378 *and PER3 are associated with sleep timing.*

379 Most of the reported variants are missense variants and some, for example, *CRY1*  
380 c.1657+3A>C have been shown to have a specific gain of function effect in *in-vitro*  
381 experiments<sup>10</sup>. Only the reported *TIMELESS* gene variant is a protein truncating  
382 variant (PTV) and it is unclear whether the reported Mendelian sleep variants act  
383 through loss of function due to haploinsufficiency. We therefore identified all rare  
384 (MAF<0.01%) nonsense, frameshift and essential splice site variants across the ten  
385 Mendelian sleep and circadian genes. The number of individuals with rare high  
386 confidence loss-of-function variants in these genes ranged from 10 for *ADRB1* to  
387 205 for *TIMELESS*. We subsequently performed burden testing of loss-of-function  
388 variants for these 10 genes in up to 184,065 individuals of European ancestry,  
389 including and adjusting for relatedness (**Supplementary Tables 11-14**). We  
390 identified associations between *PER2* and self-reported measures of diurnal  
391 preference and accelerometer-estimates of sleep timing. We observed associations  
392 between loss-of-function variants in the *PER2* gene and UK Biobank participants  
393 self-reporting as “definitely a morning person” (Burden  $P=4\times 10^{-8}$ ) (**Supplementary**  
394 **Table 12**), and accelerometer-estimates of sleep-midpoint (Burden  $P=5\times 10^{-7}$ ) and L5  
395 timing (Burden  $P=9\times 10^{-4}$ )(**Supplementary Table 14**). Of 64 unrelated European  
396 carriers carrying at least one of the 50 loss-of-function variants in the *PER2* gene,  
397 58% (n=37) self-reported as “definitely a morning person” in contrast to 24%  
398 (n=40,438) among non-carriers (Fisher’s exact  $P<0.0001$ ) (**Supplementary Table**  
399 **15**). Within unrelated individuals, compared with non-carriers of loss-of-function  
400 variants in *PER2*, carriers had an earlier average sleep-midpoint of ~57 minutes (t-  
401 test  $P<0.0001$ ) (**Supplementary Table 16**) and an earlier average L5 timing of ~33  
402 minutes (t-test  $P=0.027$ ) (**Supplementary Table 17**). In addition, our burden testing  
403 identified an association between loss-of-function variants in *PER3* and L5-timing  
404 (Burden  $P=4\times 10^{-6}$ ) (**Supplementary Table 14**). Our gene-based analyses for high  
405 confidence PTVs did not result in associations for other previously reported

406 monogenic genes for sleep duration or timing. We observed no associations in gene-  
407 based tests of rare missense variants in these genes after accounting for multiple  
408 testing (Bonferroni  $P=0.0001$  based on 42 tests across 10 genes).

409

410

## 411 DISCUSSION

412

413 Recent studies have identified 10 genes where specific variants are reported to  
414 cause familial natural short sleep, familial advanced sleep phase, or delayed sleep  
415 phase. These studies have tended to be based on a limited number of families  
416 ascertained to have a specific sleep trait. This form of ascertainment means the  
417 effect of the variants and genes when identified in the population is unknown. Here,  
418 we show that most previously reported variants for Mendelian sleep and circadian  
419 conditions are not highly penetrant when ascertained incidentally from the general  
420 population. Incidental findings are becoming increasingly common with the increase  
421 in whole genome sequencing both from direct-to-consumer companies and through  
422 health services. It is important, therefore, to get accurate estimates of the risk of  
423 developing a condition so that individuals are not misdiagnosed and/or potentially  
424 incorrectly treated for a condition.

425

426 We and others have shown previously<sup>13</sup> that the penetrance of rare Mendelian  
427 disease variants is likely to be lower when estimated from population-based cohorts  
428 than in ascertained discovery or clinical cohorts and this may be the case for the  
429 genes and variants reported here. It is also possible that some of the reported genes  
430 and variants are not causes of the reported sleep conditions in humans. The  
431 functional effect of each the variants assessed here are supported by extensive *in*  
432 *vitro* and animal model studies. The level of human genetic evidence varies across  
433 studies, from 6 individuals from a single pedigree for the *ADBR1* variant to 78  
434 individuals from 7 families for the *CRY1* c.1657+3A>C variant. It is therefore possible  
435 that some of the reported variants with weaker human genetic evidence do not  
436 cause monogenic sleep and circadian conditions in humans. However, because of  
437 the nature of the ascertainment, our study cannot address pathogenicity and can  
438 only conclude that the effect of these variants when identified incidentally from the  
439 population appears to be much weaker than previously reported.

440

441 There are several other possible explanations for the differences between our  
442 studies. Genetic background may play a role. Sleep is so important to survival, that  
443 homeostatic mechanisms are extremely robust. For example, the very strong  
444 circadian phenotype of homozygous *PER2* KO allele<sup>27</sup> was completely absent when  
445 crossed onto a C57/Bl6 background<sup>28</sup>. Our work underscores the significant  
446 challenges of behavioral genetics. It is possible that an individual or family presenting  
447 to a clinic with a specific sleep or circadian condition have an increased polygenic  
448 susceptibility to sleep duration, in addition to the monogenic variant. For example,  
449 we have recently identified 351 variants for being a morning person from genome-  
450 wide association studies. Individuals in the highest 5% of polygenic risk had an  
451 average sleep timing of 25 mins earlier compared to the lowest polygenic risk  
452 individuals. As has been shown for traits such as lipids and BMI<sup>29</sup>, this suggests that  
453 extreme polygenic risk can have similar effect sizes to monogenic variants for sleep  
454 traits. Ancestry differences may also play a role. For example, the *CRY1*  
455 c.1657+3A>C association was discovered in an American family and followed up in

456 Turkish families. A recent paper has found association with the *CRY1* variants and  
457 sleep-midpoint timing (~40 mins) in an independent cohort of Turkish ancestry  
458 individuals<sup>30</sup>. The difference in effect size between these studies may be due to  
459 different genetic backgrounds between these previous populations and the  
460 predominantly Northern European ancestry population used in our analyses. There  
461 are also potential environmental (e.g. daylight hours) and societal explanations for  
462 the different results in this study compared to previous studies.

463  
464 There are several limitations to our study which provide other possible explanations  
465 for the weaker associations observed here compared to previous studies. First, the  
466 UK Biobank has a healthy volunteer bias<sup>31</sup> and may select against individuals with  
467 sleep disorders. However, this is unlikely for FASP and FNSS where the phenotypes  
468 of phase advance or short sleep rarely affect individuals' well-being<sup>20</sup>. Additionally,  
469 the allele frequency of the variants in UK Biobank is similar to that in a large  
470 resource of exome data (gnomAD) suggesting limited selection against these  
471 variants. Second, reported sleep patterns that are often shaped by social factors,  
472 and thus may not reflect their underlying sleep preferences. This could explain the  
473 lack of association with sleep timing for example. However, we find no association  
474 with the variants with traits such as self-reported ease of getting up and limiting the  
475 analyses to an individual's activity on the weekend shows a similar lack of  
476 association. Additionally, we find no association with any measures of sleep quality  
477 or disruption in the UK Biobank, including those defined by medical record codings,  
478 although sleep fragmentation has been observed in *CRY1* c.1657+3A>C carriers<sup>10</sup>.

479  
480 Another limitation to this study is that it is not possible to do as detailed sleep and  
481 circadian phenotyping in this large-scale study as is possible in smaller scale clinical  
482 studies. We have, however, used multiple data sources including self-report and  
483 activity monitor data and have used primary care and inpatient data to identify sleep  
484 disorders. We have previously validated the activity monitor sleep estimates against  
485 polysomnography data<sup>32</sup> and it is a reliable measure of many sleep parameters. The  
486 validity of the measures is also confirmed by the statistically robust associations with  
487 *PER2* and *PER3* protein truncating variants using both self-report and  
488 accelerometry, with effects of sleeping timing of approximately 1 hour. We have also  
489 demonstrated this through the robust association of hundreds of common genetic  
490 variants with chronotype<sup>14</sup>, sleep duration<sup>33</sup> and other sleep measures through  
491 genome-wide association studies (GWAS)<sup>19,21</sup>. The number of individuals with  
492 variants is relatively low for some genes, but the number of individuals carrying  
493 previously identified variants is usually larger than the number of available in the  
494 original reports.

495 Our work demonstrates that haploinsufficiency of *PER2* affects circadian timing in  
496 humans. We find a substantial effect on chronotype and sleep timing for individuals  
497 with heterozygous *PER2* protein truncating variants. This is unexpected because  
498 only homozygous *Per2* knockout mice exhibit a circadian shortened circadian period,  
499 with no phenotype in heterozygotes<sup>34</sup>. The human genetic evidence for a role of the  
500 *PER2* S662G missense variant is robust with co-segregation in a large pedigree with  
501 FASPS<sup>5</sup>. It was initially thought that the effect of this S662G variant was caused by  
502 decreased phosphorylation of PER by CK1 $\epsilon$  that could stabilize it leading to PER  
503 accumulating prematurely and shortened circadian period. Others have suggested

504 that the S662G mutation results in decreased PER2 levels and/or an increased  
505 turnover of nuclear PER2<sup>35</sup>. Our work shows that, in humans, haploinsufficiency of  
506 *PER2* causes a substantial effect on diurnal preference and sleeping timing.

507 Our results indicate that most previously reported variants for Mendelian sleep and  
508 circadian conditions are not highly penetrant causes of extreme sleep duration or  
509 timing when ascertained incidentally from the population.

510

511

## 512 **ACKNOWLEDGEMENTS**

513

514 We thank Louis Ptáček, Alina Patke and Michael Young for helpful discussion and  
515 comments on the manuscript. R.N.B is supported by grant MR/T00200X/1. Whole  
516 genome sequencing (WGS) for the Trans-Omics in Precision Medicine (TOPMed)  
517 program was supported by the National Heart, Lung and Blood Institute (NHLBI).  
518 WGS for “NHLBI TOPMed: Multi-Ethnic Study of Atherosclerosis (MESA)”  
519 (phs001416.v1.p1) was performed at the Broad Institute of MIT and Harvard  
520 (3U54HG003067-13S1). Core support including centralized genomic read mapping  
521 and genotype calling, along with variant quality metrics and filtering were provided by  
522 the TOPMed Informatics Research Center (3R01HL-117626-02S1; contract  
523 HHSN268201800002I). Core support including phenotype harmonization, data  
524 management, sample-identity QC, and general program coordination were provided  
525 by the TOPMed Data Coordinating Center (R01HL-120393; U01HL-120393; contract  
526 HHSN268201800001I). We gratefully acknowledge the studies and participants who  
527 provided biological samples and data for MESA and TOPMed. JSK was supported  
528 by the Pulmonary Fibrosis Foundation Scholars Award and grant K23-HL-150301  
529 from the NHLBI. MRA was supported by grant K23-HL-150280, AJP was supported  
530 by grant K23-HL-140199, and AM was supported by R01-HL131565 from the NHLBI.  
531 EJB was supported by grant K23-AR-075112 from the National Institute of Arthritis  
532 and Musculoskeletal and Skin Diseases.

533

534 The MESA project is conducted and supported by the National Heart, Lung, and  
535 Blood Institute (NHLBI) in collaboration with MESA investigators. Support for MESA  
536 is provided by contracts 75N92020D00001, HHSN268201500003I, N01-HC-95159,  
537 75N92020D00005, N01-HC-95160, 75N92020D00002, N01-HC-95161,  
538 75N92020D00003, N01-HC-95162, 75N92020D00006, N01-HC-95163,  
539 75N92020D00004, N01-HC-95164, 75N92020D00007, N01-HC-95165, N01-HC-  
540 95166, N01-HC-95167, N01-HC-95168, N01-HC-95169, UL1-TR-000040, UL1-TR-  
541 001079, and UL1-TR-001420. Also supported in part by the National Center for  
542 Advancing Translational Sciences, CTSI grant UL1TR001881, and the National  
543 Institute of Diabetes and Digestive and Kidney Disease Diabetes Research Center  
544 (DRC) grant DK063491 to the Southern California Diabetes Endocrinology Research  
545 Center.

546

## 547 **ETHICS AND CONSENT**

548 The UK Biobank was granted ethical approval by the North West Multi-centre  
549 Research Ethics Committee (MREC) to collect and distribute data and samples from  
550 the participants (<http://www.ukbiobank.ac.uk/ethics/>) and covers the work in this  
551 study, which was performed under UK Biobank application numbers 9072 and

552 16434. All participants included in these analyses gave informed consent to  
553 participate.

554

555 **DATA AVAILABILITY**

556 The datasets analyzed for this study are available on application to the participating  
557 studies.

## TABLES

**Table 1.** Summary of twelve variants previously reported to be causal for Mendelian sleep and circadian conditions, including the variant frequencies catalogued in gnomAD.

| PubMed ID | Gene                  | Variant     | CHR:BP <sup>a</sup> | rsID <sup>b</sup> | Trait             | gnomAD AAF <sup>f</sup> | gnomAD EAF <sup>g</sup> |
|-----------|-----------------------|-------------|---------------------|-------------------|-------------------|-------------------------|-------------------------|
| 33065013  | <i>GRM1</i>           | S458A       | 6:146352435         | rs151255685       | FNSS <sup>c</sup> | 2x10 <sup>-4</sup>      | 2x10 <sup>-4</sup>      |
| 33065013  | <i>GRM1</i>           | R889W       | 6:146426563         | rs768023437       | FNSS <sup>c</sup> | 3x10 <sup>-5</sup>      | 6x10 <sup>-5</sup>      |
| 31619542  | <i>NPSR1</i>          | Y206H       | 7:34827538          | rs1406844918      | FNSS <sup>c</sup> | 4x10 <sup>-6</sup>      | 9x10 <sup>-6</sup>      |
| 31473062  | <i>ADRB1</i>          | A187V       | 10:114044692        | rs776439595       | FNSS <sup>c</sup> | 4x10 <sup>-5</sup>      | 8x10 <sup>-5</sup>      |
| 19679812  | <i>BHLHE41 (DEC2)</i> | P384R       | 12:26122364         | rs121912617       | FNSS <sup>c</sup> | 3x10 <sup>-5</sup>      | 5x10 <sup>-5</sup>      |
| 28388406  | <i>CRY1</i>           | c.1657+3A>C | 12:106992962        | rs184039278       | DSPD <sup>d</sup> | 4x10 <sup>-3</sup>      | 5x10 <sup>-3</sup>      |
| 26903630  | <i>PER3</i>           | P415A       | 1:7809893           | rs150812083       | FASP <sup>e</sup> | 6x10 <sup>-3</sup>      | 6x10 <sup>-3</sup>      |
| 26903630  | <i>PER3</i>           | H417R       | 1:7809900           | rs139315125       | FASP <sup>e</sup> | 6x10 <sup>-3</sup>      | 6x10 <sup>-3</sup>      |
| 11232563  | <i>PER2</i>           | PER2S662G   | 2:238257003         | rs121908635       | FASP <sup>e</sup> | -                       | -                       |
| 27529127  | <i>CRY2</i>           | A260T       | 11:45867648         | rs201220841       | FASP <sup>e</sup> | 6x10 <sup>-5</sup>      | 1x10 <sup>-4</sup>      |
| 31138685  | <i>TIMELESS</i>       | R1081X      | 12:56418347         | rs1465092391      | FASP <sup>e</sup> | 8x10 <sup>-6</sup>      | 2x10 <sup>-5</sup>      |
| 15800623  | <i>CSNK1D</i>         | T44A        | 17:82265743         | rs104894561       | FASP <sup>e</sup> | 4x10 <sup>-6</sup>      | 9x10 <sup>-6</sup>      |

<sup>a</sup>chromosome and base-pair position defined by the Genome Reference Consortium Human Build 38; <sup>b</sup>reference SNP (rs) cluster identifier of variant; <sup>c</sup>familial natural short sleep; <sup>d</sup>delayed sleep phase disorder; <sup>e</sup>familial advanced sleep phase; <sup>f</sup>allele frequency of minor allele across all ancestries catalogued in gnomAD (version 2.1). <sup>g</sup>allele frequency of minor allele within samples of European ancestry (excluding Finnish) catalogued in gnomAD (version 2.1).

**Table 2.** Maximum genotype counts for 12 previously reported monogenic causes of sleep and circadian conditions in unrelated individuals of European ancestry from the UK Biobank, FinnGen and MESA studies. Genotype counts are based on availability of sleep characteristics relevant to each gene.

| Gene / Variant                | Trait             | REF/ALT <sup>d</sup> | UK Biobank           |                      |                      | FINNGEN              |                      |                      | MESA                 |                      |                      |
|-------------------------------|-------------------|----------------------|----------------------|----------------------|----------------------|----------------------|----------------------|----------------------|----------------------|----------------------|----------------------|
|                               |                   |                      | REF/REF <sup>e</sup> | REF/ALT <sup>f</sup> | ALT/ALT <sup>g</sup> | REF/REF <sup>e</sup> | REF/ALT <sup>f</sup> | ALT/ALT <sup>g</sup> | REF/REF <sup>e</sup> | REF/ALT <sup>f</sup> | ALT/ALT <sup>g</sup> |
| <i>GRM1</i> / S458A           | FNSS <sup>a</sup> | T/G                  | 169,451              | 67                   | -                    | 5,927                | 2                    | 0                    | -                    | -                    | -                    |
| <i>GRM1</i> / R889W           | FNSS <sup>a</sup> | A/T                  | 169,513              | 3                    | -                    | -                    | -                    | -                    | -                    | -                    | -                    |
| <i>NPSR1</i> / Y206H          | FNSS <sup>a</sup> | T/C                  | -                    | -                    | -                    | -                    | -                    | -                    | -                    | -                    | -                    |
| <i>ADRB1</i> / A187V          | FNSS <sup>a</sup> | C/T                  | 169,450              | 69                   | -                    | -                    | -                    | -                    | -                    | -                    | -                    |
| <i>BHLHE41 (DEC2)</i> / P384R | FNSS <sup>a</sup> | G/C                  | 169,500              | 10                   | -                    | -                    | -                    | -                    | 1,993                | 22                   | -                    |
| <i>CRY1</i> / c.1657+3A>C     | DSPD <sup>b</sup> | T/G                  | 168,586              | 1,480                | 9                    | 2,838                | 4                    | 0                    | -                    | -                    | -                    |
| <i>PER3</i> / P415A           | FASP <sup>c</sup> | C/G                  | 168,500              | 1,565                | 7                    | 2,734                | 149                  | 3                    | 2,003                | 12                   | -                    |
| <i>PER3</i> / H417R           | FASP <sup>c</sup> | A/G                  | 168,500              | 1,567                | 7                    | 2,734                | 149                  | 3                    | 2,003                | 12                   | -                    |
| <i>PER2</i> / PER2S662G       | FASP <sup>c</sup> | A/G                  | -                    | -                    | -                    | -                    | -                    | -                    | -                    | -                    | -                    |
| <i>CRY2</i> / A260T           | FASP <sup>c</sup> | G/A                  | 170,038              | 38                   | -                    | -                    | -                    | -                    | -                    | -                    | -                    |
| <i>TIMELESS</i> / R1081X      | FASP <sup>c</sup> | G/A                  | 170,064              | 5                    | -                    | -                    | -                    | -                    | -                    | -                    | -                    |
| <i>CSNK1D</i> / T44A          | FASP <sup>c</sup> | T/C                  | 170,075              | 1                    | -                    | -                    | -                    | -                    | -                    | -                    | -                    |

<sup>a</sup>familial natural short sleep; <sup>b</sup>delayed sleep phase disorder; <sup>c</sup>familial advanced sleep phase; <sup>d</sup>reference allele / alternate allele; <sup>e</sup>number of homozygous carriers for reference allele; <sup>f</sup>number of heterozygous carriers; <sup>g</sup>number of homozygous carriers for alternate allele.

**Table 3.** Summary of self-reported sleep duration in UK Biobank (data field 1160) between carriers of variants previously reported to be causal for familial natural short sleep and non-carriers (homozygous reference called by UK Biobank exome-sequencing) who are also non-carriers for any of the other 12 variants described in this article.

| Gene    | Variant | REF/ALT <sup>a</sup> | Study   | Genotype | N <sup>b</sup> | Self-report sleep duration (hrs) |                  |                         |                | Reporting ≤6 hours sleep |                  |                |
|---------|---------|----------------------|---------|----------|----------------|----------------------------------|------------------|-------------------------|----------------|--------------------------|------------------|----------------|
|         |         |                      |         |          |                | Min <sup>c</sup>                 | Max <sup>d</sup> | Mean (SD <sup>e</sup> ) | P <sup>f</sup> | % <sup>g</sup>           | Cases / Controls | P <sup>h</sup> |
| ADRB1   | A187V   | C/T                  | UKB     | C/C      | 166,291        | 1                                | 12               | 7.17 (1.07)             | 0.62           | 23.74                    | 39,484 / 126,807 | 1.00           |
|         |         |                      |         | C/T      | 69             | 5                                | 12               | 7.10 (1.03)             |                | 23.19                    | 16 / 53          |                |
| BHLHE41 | P384R   | G/C                  | UKB     | G/G      | 166,283        | 1                                | 12               | 7.17 (1.07)             | 0.69           | 23.74                    | 39,483 / 126,800 | 0.47           |
|         |         |                      |         | G/C      | 10             | 5                                | 9                | 7.30 (1.06)             |                | 10.00                    | 1 / 9            |                |
| GRM1    | S458A   | T/G                  | UKB     | T/T      | 166,290        | 1                                | 12               | 7.17 (1.07)             | 0.81           | 23.74                    | 39,484 / 126,806 | 0.39           |
|         |         |                      |         | T/G      | 67             | 4                                | 10               | 7.13 (1.15)             |                | 28.36                    | 19 / 48          |                |
|         |         |                      | FinnGen | T/T      | 5,927          | 3                                | 15               | 7.59 (1.20)             | 0.92           | 14.10                    | 837 / 5,090      | 1.00           |
|         |         |                      |         | T/G      | 2              | 7                                | 8                | 7.50 (0.71)             |                | 0.00                     | 0 / 2            |                |
| A889T   | A/T     | UKB                  | A/A     | 166,288  | 1              | 12                               | 7.17 (1.07)      | 0.18                    | 23.75          | 39,485 / 126,803         | 1.00             |                |
|         |         |                      | A/T     | 3        | 8              | 8                                | 8.00 (0.00)      |                         | 0.00           | 0 / 3                    |                  |                |

<sup>a</sup>reference allele / alternate allele; <sup>b</sup>number of individuals in genotype group; <sup>c</sup>minimum sleep duration self-reported in genotype group; <sup>d</sup>maximum sleep duration self-reported in genotype group; <sup>e</sup>standard deviation; <sup>f</sup>t-test *P*-value (two-sided); <sup>g</sup>%=percentage of individuals in genotype group self-reporting ≤6 hours sleep duration (cases); <sup>h</sup>Fisher's exact-test *P*-value (two-sided).



**Table 4.** Summary of average accelerometer derived sleep duration (hours) (all nights) in the subset of exome-sequenced unrelated Europeans in UK Biobank, split by for carriers and non-carriers of variants previously reported to be causal for familial natural short sleep.

| Gene                 | Variant | Genotype | N <sup>a</sup> | Min <sup>b</sup> | Max <sup>c</sup> | Mean | SD <sup>d</sup> | P <sup>e</sup> |
|----------------------|---------|----------|----------------|------------------|------------------|------|-----------------|----------------|
| <i>ADRB1</i>         | A187V   | C/C      | 34,168         | 1.63             | 11.87            | 7.30 | 0.86            | 0.20           |
|                      |         | C/T      | 15             | 6.89             | 8.83             | 7.59 | 0.49            |                |
| <i>BHLHE4 (DEC2)</i> | P384R   | G/G      | 34,167         | 1.63             | 11.87            | 7.30 | 0.86            | 0.62           |
|                      |         | G/C      | 4              | 6.26             | 8.25             | 7.51 | 0.92            |                |
| <i>GRM1</i>          | S458A   | T/T      | 34,166         | 1.63             | 11.87            | 7.30 | 0.86            | 0.92           |
|                      |         | T/G      | 10             | 6.48             | 8.30             | 7.33 | 0.76            |                |
|                      | A889T   | A/A      | 34,167         | 1.63             | 11.87            | 7.30 | 0.86            | -              |
|                      |         | A/T      | 0              | -                | -                | -    | -               |                |

<sup>a</sup>number of individuals in genotype group; <sup>b</sup>minimum average sleep duration in genotype group; <sup>c</sup>maximum average sleep duration in genotype group; <sup>d</sup>standard deviation; <sup>e</sup>t-test *P*-value (two-sided).



<sup>a</sup>percentage of individuals in genotype group self-reporting being “definitely a ‘morning’ person”; <sup>b</sup>Fisher’s exact-test *P*-value (two-sided); <sup>c</sup>number of individuals; <sup>d</sup>minimum phenotypic value; <sup>e</sup>maximum phenotypic value; <sup>f</sup>SD=standard deviation; <sup>g</sup>carrier status t-test *P*-value (two-sided). Homozygous carriers for rare alleles combined with heterozygote carriers when performing Fisher’s exact-test.

**Table 6.** Proportion of individuals self-reporting as being “definitely an evening person”, average L5 timing, and average sleep-midpoint across all nights for each genotype group of the *CRY1* variant previously reported to be causal for delayed sleep phase disorder in the UK Biobank (UKB), Finnish and MESA studies. Accelerometer based estimates of sleep timing unavailable in the Finnish studies. Self-reported “Eveningness” and accelerometer estimates of L5-timing unavailable in MESA.

| Gene | Variant     | Study   | Genotype | Definitely an "Evening" Person |                  |                | Accelerometer L5 Timing |                  |                  |       |                 |                | Accelerometer Sleep Midpoint |                  |                  |       |                 |                |       |
|------|-------------|---------|----------|--------------------------------|------------------|----------------|-------------------------|------------------|------------------|-------|-----------------|----------------|------------------------------|------------------|------------------|-------|-----------------|----------------|-------|
|      |             |         |          | % <sup>a</sup>                 | Cases/Controls   | P <sup>b</sup> | N <sup>c</sup>          | Min <sup>d</sup> | Max <sup>e</sup> | Mean  | SD <sup>f</sup> | P <sup>g</sup> | N <sup>c</sup>               | Min <sup>d</sup> | Max <sup>e</sup> | Mean  | SD <sup>f</sup> | P <sup>g</sup> |       |
| CRY1 | c.1657+3A>C | UKB     | T/T      | 7.92                           | 13,212 / 153,621 |                | 33,998                  | 23.08            | 31.51            | 27.32 | 0.99            |                | 33,908                       | 23.37            | 30.59            | 27.01 | 0.85            |                |       |
|      |             |         | T/G      | 10.07                          | 149 / 1,331      | 0.003          | 318                     | 24.06            | 30.38            | 27.41 | 1.00            | 0.132          | 318                          | 24.28            | 29.60            | 27.11 | 0.88            | 0.059          |       |
|      |             |         | G/G      | 11.11                          | 1 / 8            |                | 4                       | 25.08            | 28.44            | 26.50 | 1.48            |                | 4                            | 25.49            | 27.38            | 26.50 | 0.90            |                |       |
|      |             | FinnGen | T/T      | 10                             | 284 / 2,554      |                | -                       | -                | -                | -     | -               |                | -                            | -                | -                | -     | -               | -              |       |
|      |             |         | T/G      | 0                              | 0 / 4            | 1.000          | -                       | -                | -                | -     | -               | -              | -                            | -                | -                | -     | -               | -              | -     |
|      |             | MESA    | T/T      | -                              | -                |                | -                       | -                | -                | -     | -               |                | 1,914                        | 13.19            | 34.92            | 27.05 | 2.14            |                |       |
|      |             |         | T/G      | -                              | -                |                | -                       | -                | -                | -     | -               |                | 21                           | 13.15            | 30.10            | 26.78 | 3.32            |                | 0.568 |

<sup>a</sup>percentage of individuals in genotype group self-reporting being “definitely a ‘evening person’”; <sup>b</sup>Fisher’s exact-test *P*-value (two-sided); <sup>c</sup>number of individuals.; <sup>d</sup>minimum phenotypic value; <sup>e</sup>maximum phenotypic value; <sup>f</sup>standard deviation; <sup>g</sup>carrier status t-test *P*-value (two-sided). Homozygous carriers for rare alleles combined with heterozygote carriers when performing Fisher’s exact-test.

## REFERENCES

1. Shi G, Xing L, Wu D, et al. A Rare Mutation of beta1-Adrenergic Receptor Affects Sleep/Wake Behaviors. *Neuron* 2019; **103**(6): 1044-55 e7.
2. Shi G, Yin C, Fan Z, et al. Mutations in Metabotropic Glutamate Receptor 1 Contribute to Natural Short Sleep Trait. *Curr Biol* 2020.
3. Xing L, Shi G, Mostovoy Y, et al. Mutant neuropeptide S receptor reduces sleep duration with preserved memory consolidation. *Sci Transl Med* 2019; **11**(514).
4. He Y, Jones CR, Fujiki N, et al. The transcriptional repressor DEC2 regulates sleep length in mammals. *Science* 2009; **325**(5942): 866-70.
5. Toh KL, Jones CR, He Y, et al. An hPer2 phosphorylation site mutation in familial advanced sleep phase syndrome. *Science* 2001; **291**(5506): 1040-3.
6. Zhang L, Hirano A, Hsu PK, et al. A PERIOD3 variant causes a circadian phenotype and is associated with a seasonal mood trait. *Proc Natl Acad Sci U S A* 2016; **113**(11): E1536-44.
7. Hirano A, Shi G, Jones CR, et al. A Cryptochrome 2 mutation yields advanced sleep phase in humans. *Elife* 2016; **5**.
8. Xu Y, Padiath QS, Shapiro RE, et al. Functional consequences of a CK1delta mutation causing familial advanced sleep phase syndrome. *Nature* 2005; **434**(7033): 640-4.
9. Kurien P, Hsu PK, Leon J, et al. TIMELESS mutation alters phase responsiveness and causes advanced sleep phase. *Proc Natl Acad Sci U S A* 2019; **116**(24): 12045-53.
10. Patke A, Murphy PJ, Onat OE, et al. Mutation of the Human Circadian Clock Gene CRY1 in Familial Delayed Sleep Phase Disorder. *Cell* 2017; **169**(2): 203-15 e13.
11. Sudlow C, Gallacher J, Allen N, et al. UK biobank: an open access resource for identifying the causes of a wide range of complex diseases of middle and old age. *PLoS Med* 2015; **12**(3): e1001779.
12. Tuke MA, Ruth KS, Wood AR, et al. Mosaic Turner syndrome shows reduced penetrance in an adult population study. *Genet Med* 2019; **21**(4): 877-86.
13. Wright CF, West B, Tuke M, et al. Assessing the Pathogenicity, Penetrance, and Expressivity of Putative Disease-Causing Variants in a Population Setting. *Am J Hum Genet* 2019; **104**(2): 275-86.
14. Jones SE, Lane JM, Wood AR, et al. Genome-wide association analyses of chronotype in 697,828 individuals provides insights into circadian rhythms. *Nat Commun* 2019; **10**(1): 343.
15. Weedon MN, Jackson L, Harrison JW, et al. Use of SNP chips to detect rare pathogenic variants: retrospective, population based diagnostic evaluation. *BMJ* 2021; **372**: n214.
16. Weedon MN, Jackson L, Harrison JW, et al. Assessing the analytical validity of SNP-chips for detecting very rare pathogenic variants: implications for direct-to-consumer genetic testing. *bioRxiv*, doi: 10.1101/696799 2019.
17. Szustakowski JD, Balasubramanian S, Kvikstad E, et al. Advancing human genetics research and drug discovery through exome sequencing of the UK Biobank. *Nat Genet* 2021; **53**(7): 942-8.
18. Robinson JT, Thorvaldsdottir H, Winckler W, et al. Integrative genomics viewer. *Nat Biotechnol* 2011; **29**(1): 24-6.
19. Lane JM, Jones SE, Dashti HS, et al. Biological and clinical insights from genetics of insomnia symptoms. *Nat Genet* 2019; **51**(3): 387-93.

20. Ashbrook LH, Krystal AD, Fu YH, Ptacek LJ. Genetics of the human circadian clock and sleep homeostat. *Neuropsychopharmacology* 2020; **45**(1): 45-54.
21. Pulit SL, Stoneman C, Morris AP, et al. Meta-analysis of genome-wide association studies for body fat distribution in 694 649 individuals of European ancestry. *Hum Mol Genet* 2019; **28**(1): 166-74.
22. Borodulin K, Tolonen H, Jousilahti P, et al. Cohort Profile: The National FINRISK Study. *Int J Epidemiol* 2018; **47**(3): 696-i.
23. Bild DE, Bluemke DA, Burke GL, et al. Multi-Ethnic Study of Atherosclerosis: objectives and design. *Am J Epidemiol* 2002; **156**(9): 871-81.
24. McLaren W, Gil L, Hunt SE, et al. The Ensembl Variant Effect Predictor. *Genome Biol* 2016; **17**(1): 122.
25. Karczewski KJ, Francioli LC, Tiao G, et al. The mutational constraint spectrum quantified from variation in 141,456 humans. *Nature* 2020; **581**(7809): 434-43.
26. Mbatchou J, Barnard L, Backman J, et al. Computationally efficient whole genome regression for quantitative and binary traits. *BioRxiv* 2021.
27. Bae K, Jin X, Maywood ES, Hastings MH, Reppert SM, Weaver DR. Differential functions of mPer1, mPer2, and mPer3 in the SCN circadian clock. *Neuron* 2001; **30**(2): 525-36.
28. Xu Y, Toh KL, Jones CR, Shin JY, Fu YH, Ptacek LJ. Modeling of a human circadian mutation yields insights into clock regulation by PER2. *Cell* 2007; **128**(1): 59-70.
29. Khera AV, Chaffin M, Aragam KG, et al. Genome-wide polygenic scores for common diseases identify individuals with risk equivalent to monogenic mutations. *Nat Genet* 2018; **50**(9): 1219-24.
30. Smieszek SP, Brzezynski JL, Kaden AR, et al. An Observational Study Investigating the CRY1Δ11 Variant Associated with Delayed Sleep-wake Patterns and Circadian Metabolic Output. *PREPRINT Research Square, DOI: 1021203/rs3rs-468649/v1* 2021.
31. Munafò MR, Tilling K, Taylor AE, Evans DM, Davey Smith G. Collider scope: when selection bias can substantially influence observed associations. *Int J Epidemiol* 2018; **47**(1): 226-35.
32. van Hees VT, Sabia S, Jones SE, et al. Estimating sleep parameters using an accelerometer without sleep diary. *Sci Rep* 2018; **8**(1): 12975.
33. Dashti HS, Jones SE, Wood AR, et al. Genome-wide association study identifies genetic loci for self-reported habitual sleep duration supported by accelerometer-derived estimates. *Nat Commun* 2019; **10**(1): 1100.
34. Zheng B, Larkin DW, Albrecht U, et al. The mPer2 gene encodes a functional component of the mammalian circadian clock. *Nature* 1999; **400**(6740): 169-73.
35. Takahashi JS, Hong HK, Ko CH, McDearmon EL. The genetics of mammalian circadian order and disorder: implications for physiology and disease. *Nat Rev Genet* 2008; **9**(10): 764-75.
